# Supplementary material
Source: PubMed Central journal article supplement (PMC3173510)
Supplement: NIHMS320165-supplement-Supplemental_Figure_1.pdf [file NIHMS320165-supplement-Supplemental_Figure_1.pdf]

## Supplemental Figure 1

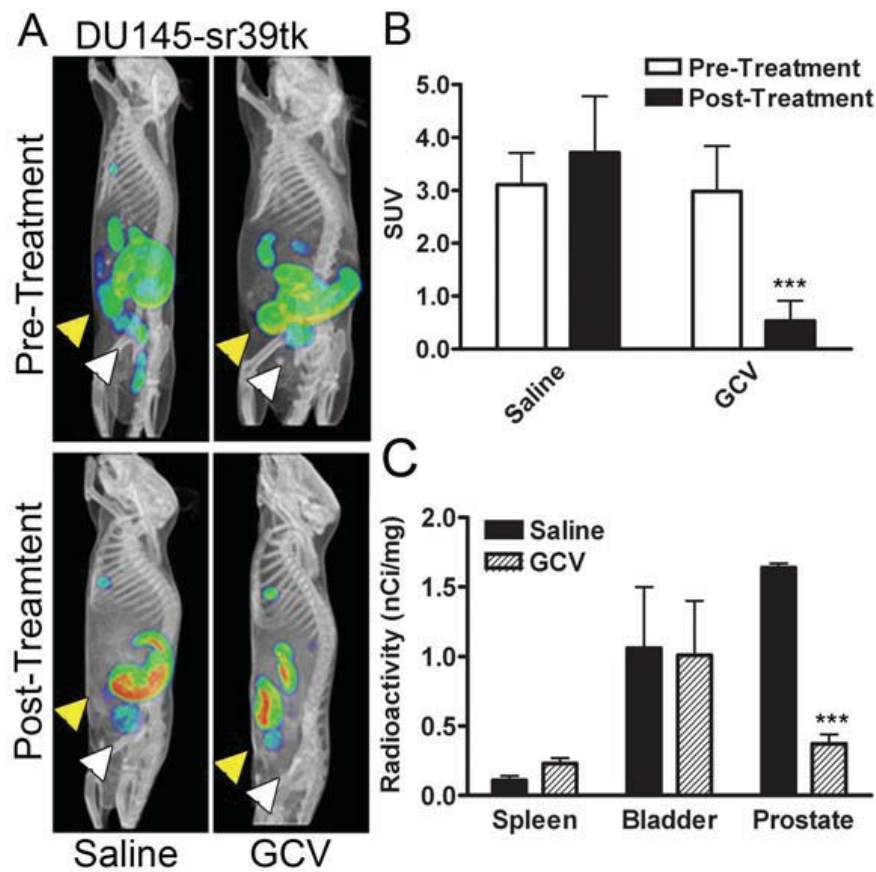

**Supplemental Figure 1: Gancyclovir-mediated ablation of sr39tk expression in orthotopic DU145 tumors confirms tumor specific signal.** Mice were implanted orthotopically with DU145 cells stably expressing sr39tk, then treated with saline (n=5) or with Gancyclovir (GCV, n=5) to ablate sr39tk expression. All PET images were obtained using 200  $\mu$ Ci  $^{18}$ F-FHBG i.v. and 3 hour tracer uptake with a 1 mL saline injection i.p. **A.** At day 21 post-implant, mice were imaged for pre-treatment tumor signals, and started on either Saline or 65 mg/kg GCV i.p. per day. Treatment was continued daily for 7 days. On day 28, mice were imaged for post-treatment tumor signals. Yellow arrows indicate bladder position and white arrows indicate tumor position. **B.** Quantification of the pre- and post-treatment  $^{18}$ F-FHBG uptake in the orthotopic tumor. SUV: Standard Uptake Value. **C.** *Ex vivo* quantification of  $^{18}$ F-FHBG uptake in the spleen, bladder, and prostate tumors. Units are nanocuries per milligram of assayed tissue. For panels b and c, p-values were obtained by Student's Two-Tailed T-Test, with the sr39tk/GCV treated group compared to the sr39tk/Saline group. \*\*\* indicates p-value<0.001.
